# Supplementary material
Source: PubMed Central journal article supplement (PMC3634371)

## Supplemental Figures

### **Figure S1. Ethanol and rapamycin inhibit mTOR activity.**

Mice were given intraperitoneal injection of ethanol (1.2 mg/kg) or rapamycin (2 mg/kg) or both for 16 hours. Liver lysates were analyzed for the level of total and phosphorylated p70 S6K and 4E-BP1. The phosphorylation of both proteins was suppressed by ethanol and rapamycin.

### **Figure S2. Autophagy remains activated in mice treated with chronic Lieber-DeCarli ethanol diet.**

Mice were given control diet (CD) or ethanol diet (ED) that accounts for 29% or 36% of total calorie intake for 4 weeks. Chloroquine (CQ, 60 mg/kg) was given the day before sacrifice. Liver lysates were prepared and the level of p62 was examined (**A**). Each lane represented one mouse sample. Densitometry was conducted and the relative abundance of p62 (standardized to the load control of beta-actin) was calculated (**B**). Values shown are mean  $\pm$  SEM from 2 mice per group. \*:  $p < 0.05$ ; \*\*:  $p < 0.01$ . *t*-test.

### **Figure S3. Lysosomal activities in mice treated chronically with ethanol diet.**

Mice were given control diet (CD) or ethanol diet (ED) that accounts for 29% or 36% of total calorie intake for 4 weeks. Liver lysates were prepared and analyzed for the activities of cathepsin B (A), cathepsin D/E (B), acidic phosphatase (C) and acid lipase (D) using Z-FR-AMC (Enzo Life Sciences), Mca-GKPILFFRLK (Dnp)-D-R (Enzo Life Sciences), 4-nitrophenyl phosphate (Sigma), and 4-methylumbelliferyl oleate (Sigma) as the substrate, respectively. Cleavage was monitored by fluorescence spectrophotometry (A, B, D) or absorption spectrophotometry (C). \*,  $p < 0.05$ ; \*\*,  $p < 0.01$ . *t*-test. RFU: relative fluorescence unit.

### **Figure S4. Impact of chloroquine on alcoholic liver inflammation.**

Livers from mice given control diet (CD), 29% ethanol diet (ED), or 36% ethanol diet (ED) for 4 weeks were fixed by 10% neutral buffered formalin and paraffin-embedded. The sections were stained with an anti-F4/80 antibody (AbD Serotec, MCA497G, Raleigh, NC) that detects the macrophage/Kupffer cell population, which was quantified per high power field (x400). Data shown are mean  $\pm$  SEM ( $n = 2-4$  per group).  $p = 0.164$  among the groups (one-way ANOVA).

**Fig. S1**

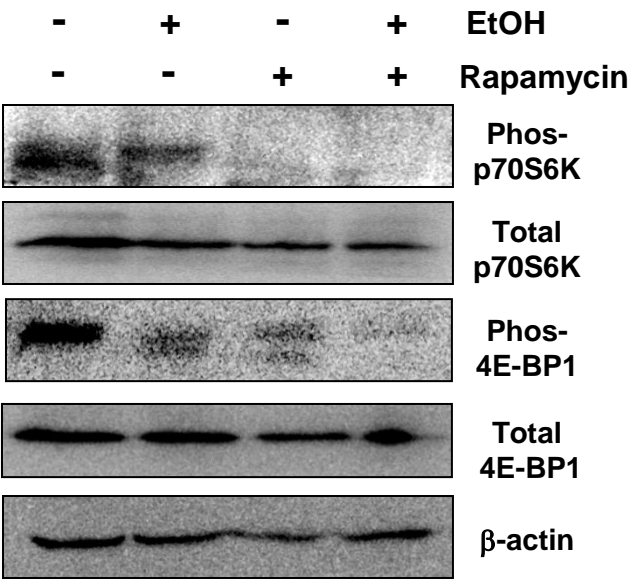

**A**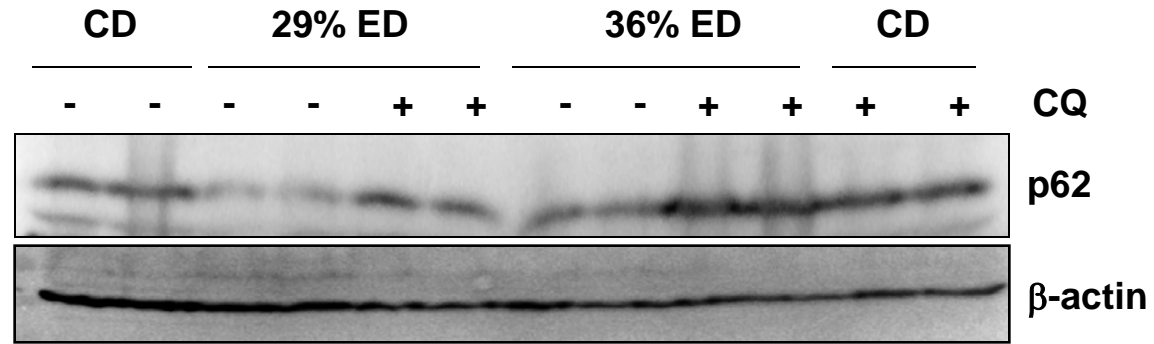**B**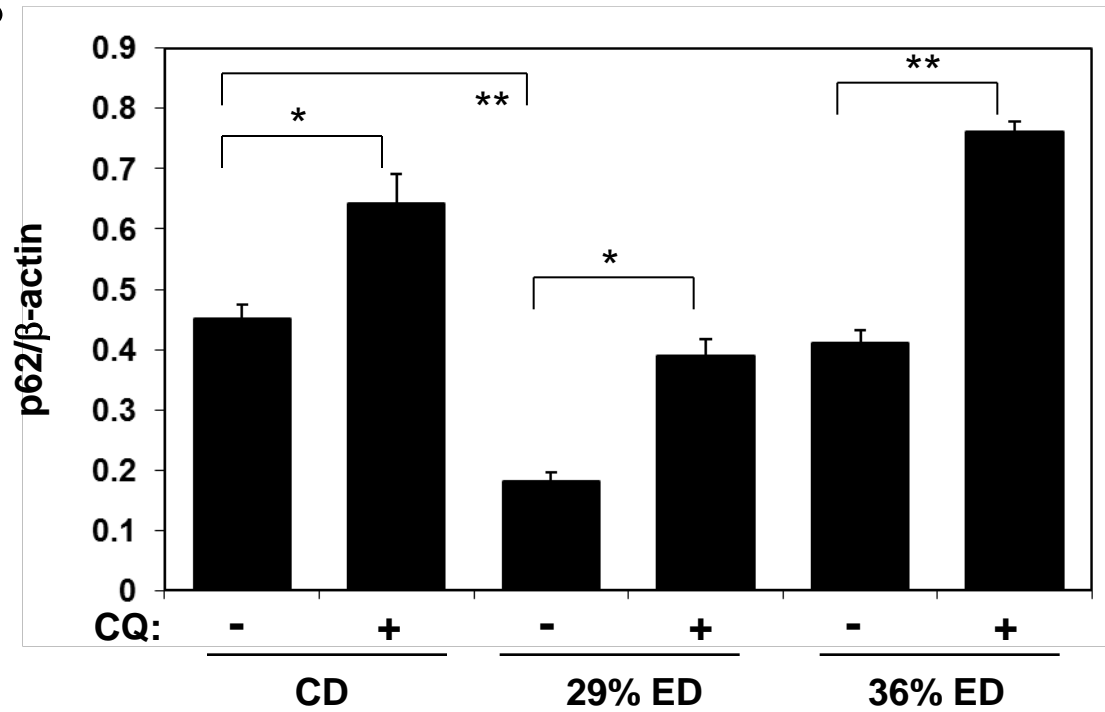

**A**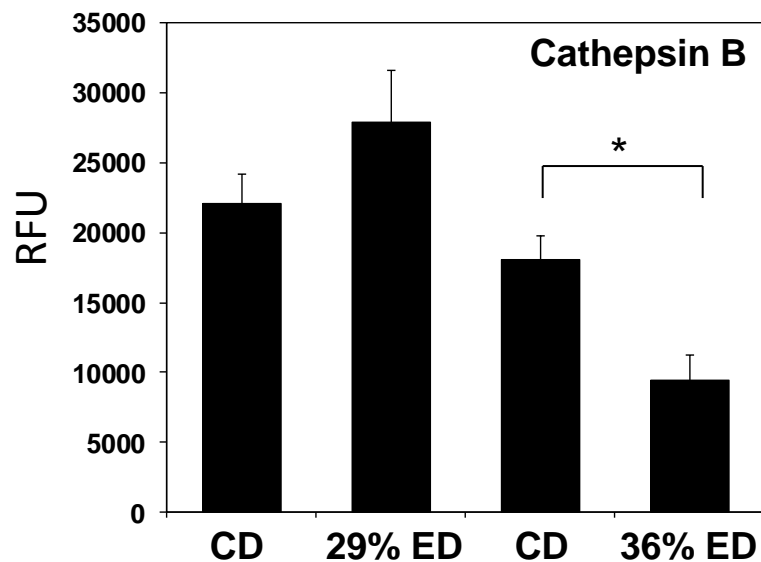**B**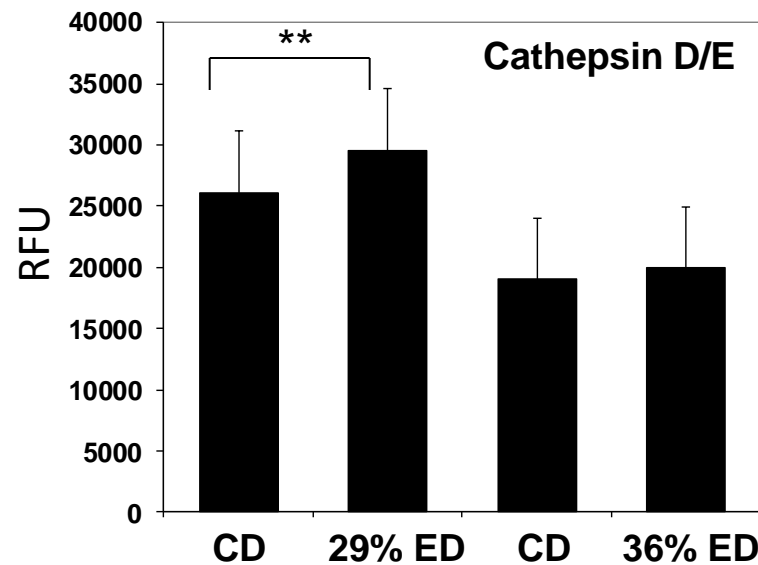**C**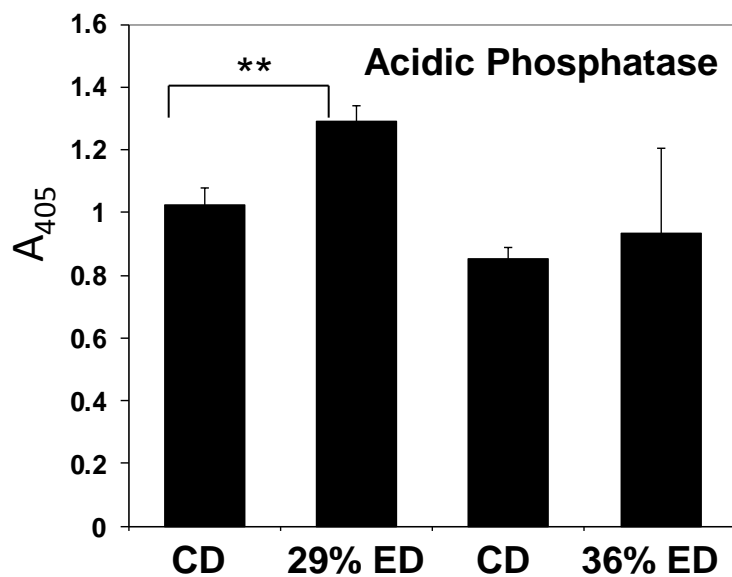**D**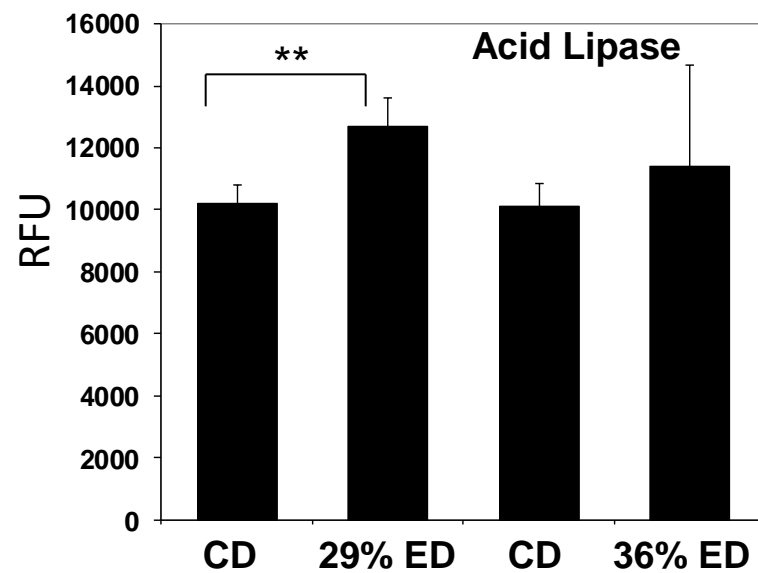

**A****- CQ****+ CQ****CD**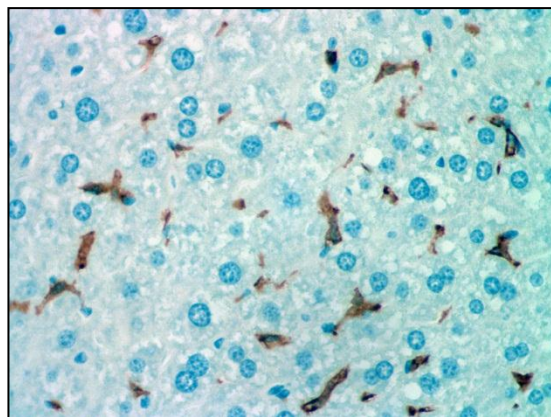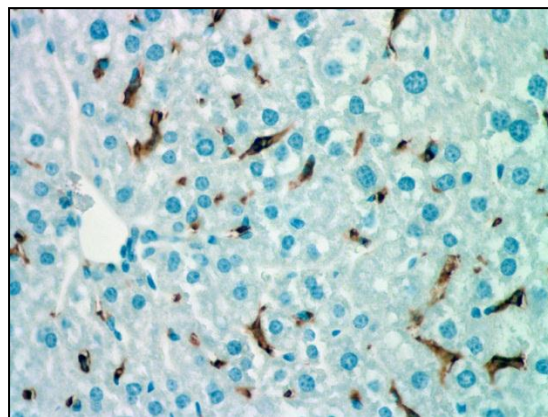**29% ED**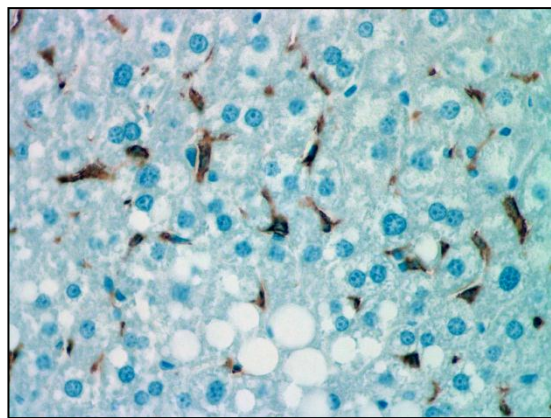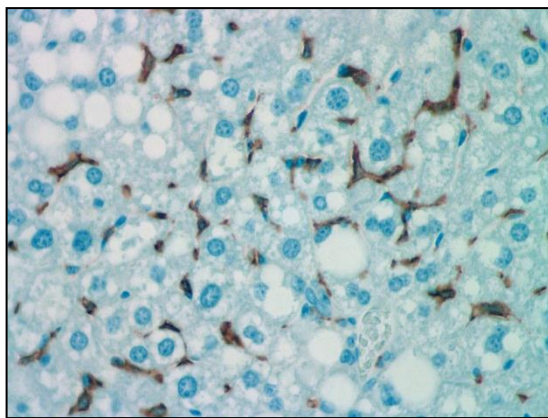**36% ED**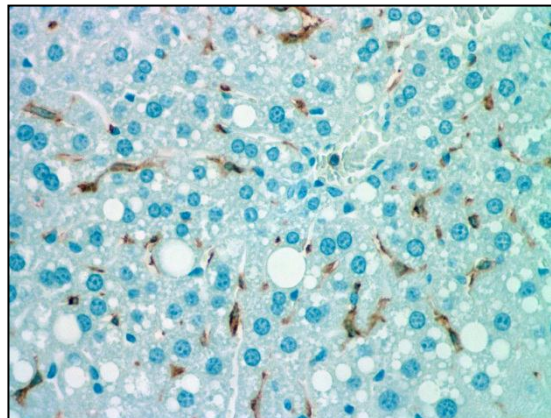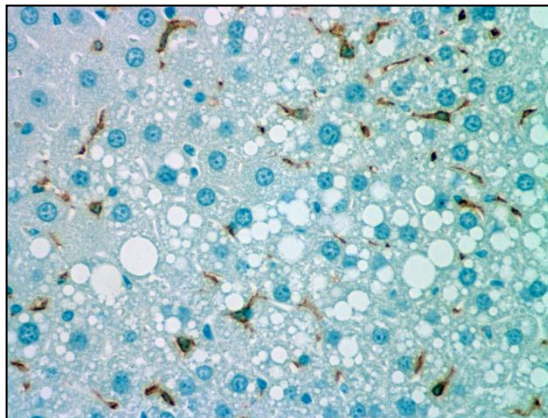**B**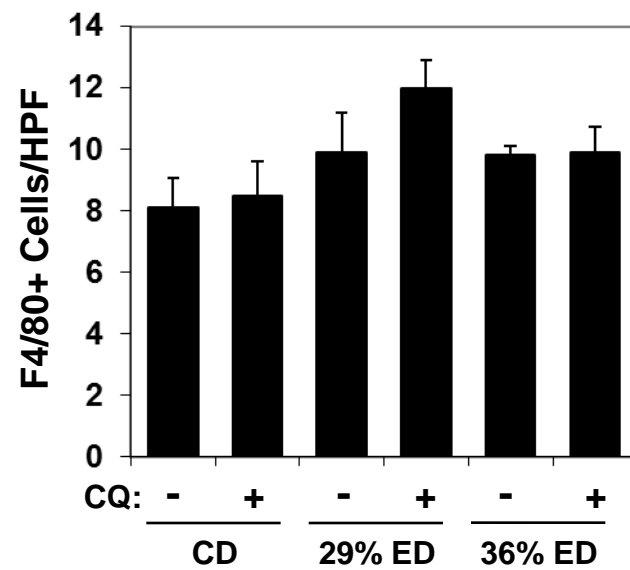

Supplement: NIHMS452222-supplement-01.pdf [file NIHMS452222-supplement-01.pdf]
